# Supplementary material
Source: PubMed Central journal article supplement (PMC3629773)
Supplement: EC.00285-12_zek999094063so2.pdf [file EC.00285-12_zek999094063so2.pdf]

Table S1. Primer sequences used in this study

| Primer Name | Primer sequence (5' to 3')                                                                                |
|-------------|-----------------------------------------------------------------------------------------------------------|
| RTA2-5DR    | AAGCCAAGGCTTCGCCTCAATTGGGCCAAGAGAATGATCCGAATTAAAT<br>TTTATTTTATGTTGTTTTTCGTGGAATTGTGAGCGGATA              |
| RTA2-3DR    | TGTCGATGACTTTTGGTACGCACATTTTGATAATCGATAGAGACAAATATC<br>GAAATTGGTCCTAATATTATTTCCAGTCACGACGTT               |
| BCR1-5DR    | ACTGCCAACTTTGAAATTAATATTCCCCCTGAAAATTTGTCTCCTTCAATC<br>AAACGATCAAATTATTCTATAATACGACTCACTATAGGGC           |
| BCR1-3DR    | TTATATAACAAACGAGTAAAGTAAGAACACTATAAAAAAGAAACAACATC<br>AAAAACATCACAAGACATAAAGCTATGACCATGATTACGCCA          |
| BCR1OE-5'   | AAAACACACACACAGTAATAAGTTTTCTCCAGTGACAACTTTTCACTTTA<br>CTCCCCCTCCTTAATTTATAATCAAGCTTGCCTCGTCCCC            |
| BCR1OE-3'   | GATTATAAGCCATAGATGCGTGCTGTGATTGATGGGAATCGTTTTGAAGTA<br>CTTGTGATGTCCCTGACATATTTGAATTCAATTGTGATG            |
| MAL31OE-5'  | ATATCTTGAAACTAGTCGTTGGTTATTCATATTTGTTCAACAACAAAAAGT<br>TCTATATTTAACCGTTGAAATCAAGCTTGCCTCGTCCCC            |
| MAL31OE-3'  | CATCCAAACTCACGATGGATGGAGTCGACACATTTTTTTCATCTGATTCCG<br>GTCTATATTCTTCAATGGTCATATTTGAATTCAATTGTGATG         |
| RTA1OE-5'   | AGCAAGTCATAAATGATGGTTAAACAGTTTTAGATAGTTTAAGGATAAGTG<br>ATATTTACTTGAGTCATTCATCAAGCTTGCCTCGTCCCC            |
| RTA1OE-3'   | TACTTGTGGAAGTTGGCAAGGAAGTAGGTGTCCATGATGGTAGATATTGA<br>TTTAAAAGAGAGACTCCGTCCATATTTGAATTCAATTGTGATG         |
| SSD1OE-5'   | TATTAATCTCAATTTGGTTGGATTTCATTCATTA AAAACTATCTGGTCAACAA<br>TTCAATTTATTACAATTTGGTGAGGCAATCAAGCTTGCCTCGTCCCC |
| SSD1OE-3'   | GCAAGTTTTTCCCCTTTCTGCTGGAAACCCTGGCTGGGGTATTATTACTGT<br>TGTTGTTGTAATCTTGTGACGAGCTCATATTTGAATTCAATTGTGATG   |
| ACT1RT-F    | CTTCTCAATCTTCTGCCATTGA                                                                                    |

|           |                           |
|-----------|---------------------------|
| ACT1RT-R  | TTCTGGAGCTCTGAATCTTTCG    |
| ACE2RT-F  | ACTACCAGACACTGCCCAAG      |
| ACE2RT-R  | TGATGGTGGATACTGCTGGC      |
| ADA2RT-F  | CAGAGCTGCCCATATCAAA       |
| ADA2RT-R  | TGGCCATTACCATTGAAAGA      |
| BCR1RT-F  | AATGCCTGCAGGTTATTTGG      |
| BCR1RT-R  | TTTTAGGTGGTGGTGGCAAT      |
| GSL1RT-F  | ATGGCGGGTATGTTCTGG        |
| GSL1RT-R  | AGGTGCCAATACAACCTGC       |
| HOG1RT-F  | GGGACTGTTTTTCAAATCACCA    |
| HOG1RT-R  | TCTTTTTGCCAATACTGAGGTCA   |
| MDM10RT-F | TCTTCATCATCAGCGTGTCC      |
| MDM10RT-R | ATGCGGCTGTCACTGTCTC       |
| PBS2RT-F  | GAAAATTCACGATGCGCCA       |
| PBS2RT-R  | ATAGATGACGATGACGCCTGC     |
| RTA1RT-F  | GCTGGCGAGGGTATTTGATA      |
| RTA1RT-R  | ATTGCCACAATGGCTTTCAT      |
| RTA2RT-F  | TCAAGTTGTGGCGATGAC        |
| RTA2RT-R  | TGACGATGACCTCTTACC        |
| SSD1RT-F  | AGTTGGTACTTACGATG         |
| SSD1RT-R  | ATCTCCCAAGCCAGCATG        |
| URA3-F    | TGCTGGTTGGAATGCTTATTTG    |
| URA3-R    | TGCAAATTCTGCTACTGGAGTT    |
| VPS51RT-F | AATCTGGACAATGCCACAAC      |
| VPS51RT-R | AATCAAGTTGTCAATGTCGTTTAGA |

Table S2. In vitro antifungal susceptibilities of selected *Candida albicans* isolates to each of five antifungal drugs

| <b>Isolate</b> | <b>MIC (µg/mL)</b> |            |             |             |             |
|----------------|--------------------|------------|-------------|-------------|-------------|
|                | <b>AMB</b>         | <b>FLU</b> | <b>VORI</b> | <b>MICA</b> | <b>CASP</b> |
| DAY185         | 0.5                | 0.25       | 0.03        | 0.03        | 0.06        |
| CA024 (AMP-S)  | 0.125              | 0.25       | 0.03        | 0.03        | 0.03        |
| CA080 (AMP-R)  | 0.25               | 0.25       | 0.03        | 0.03        | 0.125       |

AMB, amphotericin-B; FLU, fluconazole; VORI, voriconazole; MICA, micafungin; CASP, caspofungin
